# Supplementary material for: Molecular Response to Toxic Diatom-Derived Aldehydes in the Sea Urchin Paracentrotus lividus
Source: MDPI journal article supplement (doi:10.3390/md12042089), 2014-04-04
Supplement: s1 [file s1]

## Supplementary Information

**Figure S1.** Overview of the abnormal plutei after treatments with PUAs.

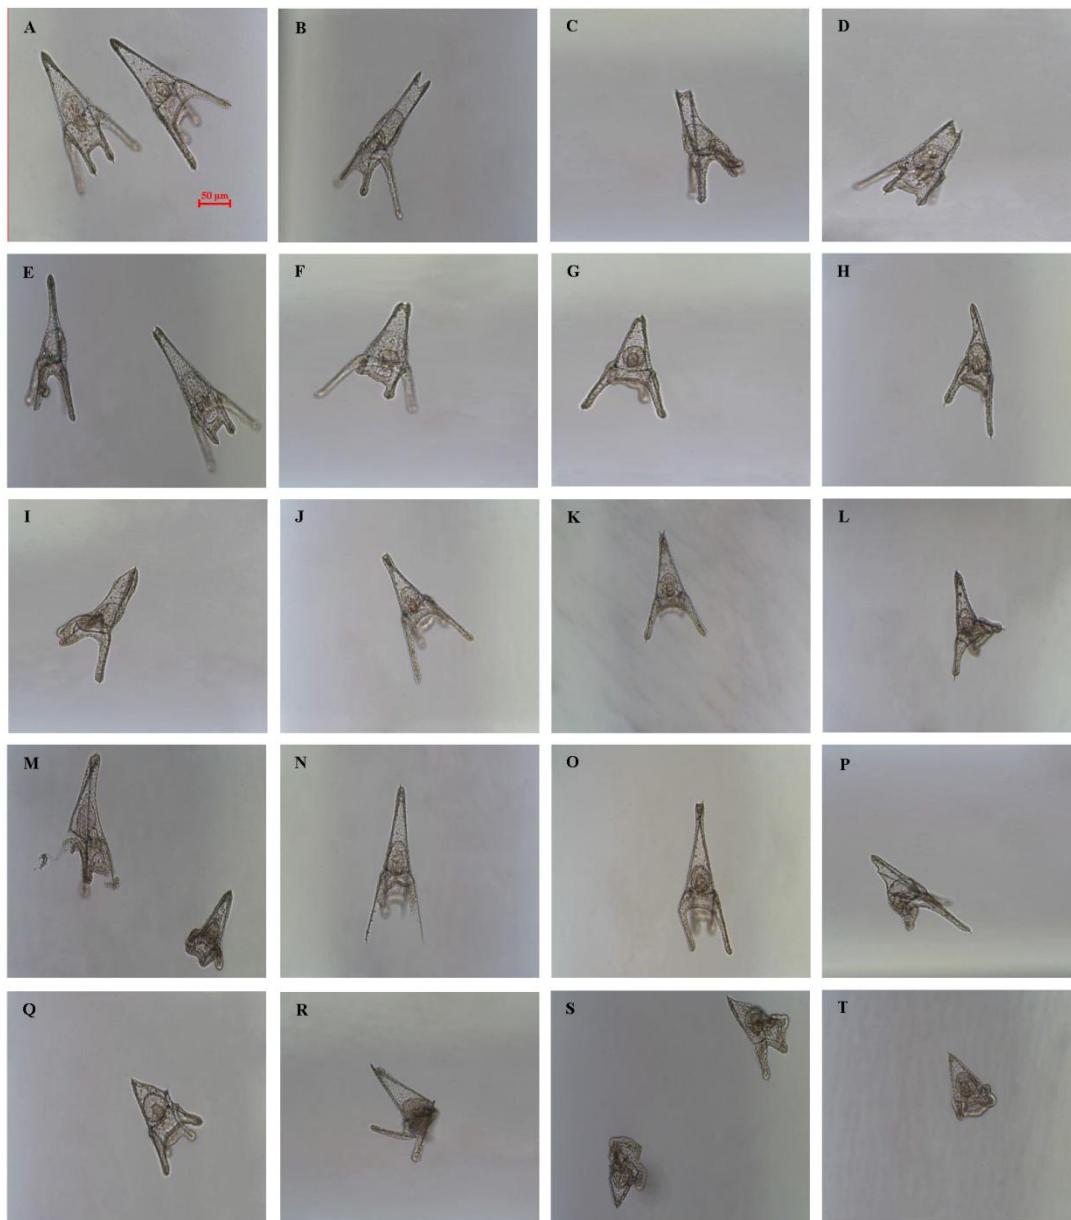

© 2014 by the authors; licensee MDPI, Basel, Switzerland. This article is an open access article distributed under the terms and conditions of the Creative Commons Attribution license (<http://creativecommons.org/licenses/by/3.0/>).
